# Supplementary material for: Response time and response time variability as indicators of response quality during static automated perimetry
Source: PubMed Central journal article supplement (PMC8850211; doi:10.1007/s00417-021-05349-z), 2021-09-13
Supplement: 417_2021_5349_MOESM2_ESM.pdf [file 417_2021_5349_MOESM2_ESM.pdf]

## Untersuchungsprotokoll

### Augenstellung und Augenbeweglichkeit

|                    | RA Intakt/Unauffällig    | RA Gestört/Auffällig     | LA Intakt/Unauffällig    | LA Gestört/Auffällig     | Bemerkungen |
|--------------------|--------------------------|--------------------------|--------------------------|--------------------------|-------------|
| Augenstellung      | <input type="checkbox"/> | <input type="checkbox"/> | <input type="checkbox"/> | <input type="checkbox"/> |             |
| Augenbeweglichkeit | <input type="checkbox"/> | <input type="checkbox"/> | <input type="checkbox"/> | <input type="checkbox"/> |             |

### Pupillen (Efferenz und Afferenz)

| Pupillen                             | Ja                       | Nein                     | RA auffällig                         | LA auffällig                         |                                                               |
|--------------------------------------|--------------------------|--------------------------|--------------------------------------|--------------------------------------|---------------------------------------------------------------|
| Pupillen rund                        | <input type="checkbox"/> | <input type="checkbox"/> | <input type="checkbox"/>             | <input type="checkbox"/>             |                                                               |
| Pupillen zentriert                   | <input type="checkbox"/> | <input type="checkbox"/> | <input type="checkbox"/>             | <input type="checkbox"/>             |                                                               |
| In Helligkeit und Dunkelheit isokor? | <input type="checkbox"/> | <input type="checkbox"/> |                                      |                                      |                                                               |
| - Anisokorie?                        |                          |                          |                                      |                                      | <input type="checkbox"/> R > L <input type="checkbox"/> R < L |
| - Bei Dunkelheit zunehmend?          | <input type="checkbox"/> | <input type="checkbox"/> |                                      |                                      | Dilatationsdefizit                                            |
| - Bei Helligkeit zunehmend?          | <input type="checkbox"/> | <input type="checkbox"/> |                                      |                                      | Kontraktionsdefizit                                           |
| RAPD?                                | <input type="checkbox"/> | <input type="checkbox"/> | <input type="checkbox"/> __, __ logE | <input type="checkbox"/> __, __ logE |                                                               |
| Sonstige Anmerkungen                 |                          |                          |                                      |                                      |                                                               |

### Vorderer Augenabschnitt

Spaltlampe (WQ900, Haag Streit, König)

|                                                                          | RA Intakt/Unauffällig                                                                                                                  | RA Gestört/Auffällig                                  | LA Intakt/Unauffällig                                                                                                                  | LA Gestört/Auffällig                                  | Bemerkungen |
|--------------------------------------------------------------------------|----------------------------------------------------------------------------------------------------------------------------------------|-------------------------------------------------------|----------------------------------------------------------------------------------------------------------------------------------------|-------------------------------------------------------|-------------|
| Bindehaut                                                                |                                                                                                                                        |                                                       |                                                                                                                                        |                                                       |             |
| Hornhaut                                                                 | <input type="checkbox"/>                                                                                                               | <input type="checkbox"/>                              | <input type="checkbox"/>                                                                                                               | <input type="checkbox"/>                              |             |
| Vorderkammer                                                             | <input type="checkbox"/>                                                                                                               | <input type="checkbox"/>                              | <input type="checkbox"/>                                                                                                               | <input type="checkbox"/>                              |             |
| Vorderkammertiefe temporale Peripherie<br>(Grad 1-4, nach W. van Herick) | <input type="checkbox"/> 0 <input type="checkbox"/> 1 <input type="checkbox"/> 2 <input type="checkbox"/> 3 <input type="checkbox"/> 4 | <input type="checkbox"/> 3 <input type="checkbox"/> 4 | <input type="checkbox"/> 0 <input type="checkbox"/> 1 <input type="checkbox"/> 2 <input type="checkbox"/> 3 <input type="checkbox"/> 4 | <input type="checkbox"/> 3 <input type="checkbox"/> 4 |             |
| Irisfarbe                                                                |                                                                                                                                        |                                                       |                                                                                                                                        |                                                       |             |
| Iris/Pupille                                                             | <input type="checkbox"/>                                                                                                               | <input type="checkbox"/>                              | <input type="checkbox"/>                                                                                                               | <input type="checkbox"/>                              |             |
| Linse                                                                    | <input type="checkbox"/>                                                                                                               | <input type="checkbox"/>                              | <input type="checkbox"/>                                                                                                               | <input type="checkbox"/>                              |             |
| Glaskörper                                                               | <input type="checkbox"/>                                                                                                               | <input type="checkbox"/>                              | <input type="checkbox"/>                                                                                                               | <input type="checkbox"/>                              |             |
| Intraokular reizfrei?                                                    | <input type="checkbox"/>                                                                                                               | <input type="checkbox"/>                              | <input type="checkbox"/>                                                                                                               | <input type="checkbox"/>                              |             |

### Augenhintergrund

BETA 200 S LED Ophthalmoskop, Heine, Herrsching

|                                   | RA                                                                                 |                          | LA                                                                                 |                          |
|-----------------------------------|------------------------------------------------------------------------------------|--------------------------|------------------------------------------------------------------------------------|--------------------------|
|                                   | Intakt/Unauffällig                                                                 | Gestört / Auffällig      | Intakt/Unauffällig                                                                 | Gestört / Auffällig      |
| Papille randscharf?               | <input type="checkbox"/>                                                           | <input type="checkbox"/> | <input type="checkbox"/>                                                           | <input type="checkbox"/> |
| Papille vital gefärbt?            | <input type="checkbox"/>                                                           | <input type="checkbox"/> | <input type="checkbox"/>                                                           | <input type="checkbox"/> |
| Zentrale Exkavation?              | <input type="checkbox"/>                                                           | <input type="checkbox"/> | <input type="checkbox"/>                                                           | <input type="checkbox"/> |
| CDR:                              |                                                                                    |                          |                                                                                    |                          |
| ISNT Regel erfüllt?               | <input type="checkbox"/>                                                           | <input type="checkbox"/> | <input type="checkbox"/>                                                           | <input type="checkbox"/> |
| Papillenrand / Nervenfaserschicht | <input type="checkbox"/>                                                           | <input type="checkbox"/> | <input type="checkbox"/>                                                           | <input type="checkbox"/> |
| Makula?                           | <input type="checkbox"/>                                                           | <input type="checkbox"/> | <input type="checkbox"/>                                                           | <input type="checkbox"/> |
|                                   | Ausprägungsgrad                                                                    |                          | Ausprägungsgrad                                                                    |                          |
| Wallreflex                        | <input type="checkbox"/> + <input type="checkbox"/> (+) <input type="checkbox"/> ∅ |                          | <input type="checkbox"/> + <input type="checkbox"/> (+) <input type="checkbox"/> ∅ |                          |
| Foveolarreflex                    | <input type="checkbox"/> + <input type="checkbox"/> (+) <input type="checkbox"/> ∅ |                          | <input type="checkbox"/> + <input type="checkbox"/> (+) <input type="checkbox"/> ∅ |                          |
|                                   | Intakt/Unauffällig                                                                 | Gestört / Auffällig      | Intakt/Unauffällig                                                                 | Gestört / Auffällig      |
| Zentrale Fixation?                | <input type="checkbox"/>                                                           | <input type="checkbox"/> | <input type="checkbox"/>                                                           | <input type="checkbox"/> |
| Exzentrischer Fixationsort:       |                                                                                    |                          |                                                                                    |                          |
| Gefäße?                           | <input type="checkbox"/>                                                           | <input type="checkbox"/> | <input type="checkbox"/>                                                           | <input type="checkbox"/> |
| a : v =                           |                                                                                    |                          |                                                                                    |                          |
| Peripherie?                       | <input type="checkbox"/>                                                           | <input type="checkbox"/> | <input type="checkbox"/>                                                           | <input type="checkbox"/> |
| <b>Bemerkungen</b>                |                                                                                    |                          |                                                                                    |                          |
