# Supplementary material for: Response time and response time variability as indicators of response quality during static automated perimetry
Source: Graefes Arch Clin Exp Ophthalmol. 2021 Sep 13;260(3):927–35. doi: 10.1007/s00417-021-05349-z (PMC8850211; doi:10.1007/s00417-021-05349-z)
Supplement: Supplementary file 1 — (PDF 394 kb) [file 417_2021_5349_MOESM1_ESM.pdf]

## Anamnesebogen

| Augenanamnese                                           | Ja                       | Nein                     | Falls ja, ab welchem Lebensjahr bzw. wann wurde Erstdiagnose gestellt? | Welches Auge ist betroffen?<br>R/L                    | Anmerkungen    |
|---------------------------------------------------------|--------------------------|--------------------------|------------------------------------------------------------------------|-------------------------------------------------------|----------------|
| 1. Brillenträger?                                       | <input type="checkbox"/> | <input type="checkbox"/> | <input type="checkbox"/> <input type="checkbox"/> . Lj.                |                                                       | _____<br>_____ |
| 2. Kontaktlinsenträger?                                 | <input type="checkbox"/> | <input type="checkbox"/> | <input type="checkbox"/> <input type="checkbox"/> . Lj                 |                                                       | _____<br>_____ |
| 3. Sehen Sie auf beiden Augen mit Korrektur gleich gut? | <input type="checkbox"/> | <input type="checkbox"/> |                                                                        |                                                       | _____<br>_____ |
| 4. Schielen bekannt?                                    | <input type="checkbox"/> | <input type="checkbox"/> | <input type="checkbox"/> <input type="checkbox"/> . Lj                 | R <input type="checkbox"/> L <input type="checkbox"/> | _____<br>_____ |
| 5. Sind Sie schwachsichtig? (Amblyopie)?                | <input type="checkbox"/> | <input type="checkbox"/> | <input type="checkbox"/> <input type="checkbox"/> . Lj                 | R <input type="checkbox"/> L <input type="checkbox"/> | _____<br>_____ |
| 6. Augenbewegungsstörungen bzw. Doppelbilder?           | <input type="checkbox"/> | <input type="checkbox"/> |                                                                        |                                                       | _____<br>_____ |
| 7. Grauer Star (Katarakt)?                              | <input type="checkbox"/> | <input type="checkbox"/> | <input type="checkbox"/> <input type="checkbox"/> . Lj                 | R <input type="checkbox"/> L <input type="checkbox"/> | _____<br>_____ |
| 8. Grüner Star (Glaukom)?                               | <input type="checkbox"/> | <input type="checkbox"/> | <input type="checkbox"/> <input type="checkbox"/> . Lj                 | R <input type="checkbox"/> L <input type="checkbox"/> | _____<br>_____ |
| 9. Netzhauterkrankungen? (z.B. Netzhautablösung,...)    | <input type="checkbox"/> | <input type="checkbox"/> | <input type="checkbox"/> <input type="checkbox"/> . Lj                 | R <input type="checkbox"/> L <input type="checkbox"/> | _____<br>_____ |
| 10. Makulaerkrankungen?                                 | <input type="checkbox"/> | <input type="checkbox"/> | <input type="checkbox"/> <input type="checkbox"/> . Lj                 | R <input type="checkbox"/> L <input type="checkbox"/> | _____<br>_____ |

| Augenanamnese                                                                                                                                                                | Ja                       | Nein                     | Falls ja, ab welchem Lebensjahr bzw. wann wurde Erstdiagnose gestellt? | Welches Auge ist betroffen?<br>R/L                    | Anmerkungen |
|------------------------------------------------------------------------------------------------------------------------------------------------------------------------------|--------------------------|--------------------------|------------------------------------------------------------------------|-------------------------------------------------------|-------------|
| 11. Schwere chronische Augenentzündungen?                                                                                                                                    | <input type="checkbox"/> | <input type="checkbox"/> | <input type="checkbox"/> <input type="checkbox"/> . Lj                 | R <input type="checkbox"/> L <input type="checkbox"/> | _____       |
| 12. Augenverletzungen?                                                                                                                                                       | <input type="checkbox"/> | <input type="checkbox"/> | <input type="checkbox"/> <input type="checkbox"/> . Lj                 | R <input type="checkbox"/> L <input type="checkbox"/> | _____       |
| 13. Augenoperationen?                                                                                                                                                        | <input type="checkbox"/> | <input type="checkbox"/> | <input type="checkbox"/> <input type="checkbox"/> . Lj                 | R <input type="checkbox"/> L <input type="checkbox"/> | _____       |
| 14. Augenmedikamente?<br>(Tropfen/Salben)                                                                                                                                    | <input type="checkbox"/> | <input type="checkbox"/> | <input type="checkbox"/> <input type="checkbox"/> . Lj                 | R <input type="checkbox"/> L <input type="checkbox"/> | _____       |
| 15. Sind in Ihrer Familie Augenerkrankungen bekannt?<br>(z.B. hohe Fehlsichtigkeiten, Glaukom [Grüner Star], Katarakt [Grauer Star], Netzhautablösung, Farbsehstörungen,...) | <input type="checkbox"/> | <input type="checkbox"/> |                                                                        |                                                       | _____       |
|                                                                                                                                                                              |                          |                          |                                                                        |                                                       | _____       |
|                                                                                                                                                                              |                          |                          |                                                                        |                                                       | _____       |
|                                                                                                                                                                              |                          |                          |                                                                        |                                                       | _____       |
|                                                                                                                                                                              |                          |                          |                                                                        |                                                       | _____       |
|                                                                                                                                                                              |                          |                          |                                                                        |                                                       | _____       |

| Allgemeinanamnese                                                | Ja                       | Nein                     | Falls ja, ab welchem Lebensjahr bzw. wann wurde Erstdiagnose gestellt? | Anmerkungen |
|------------------------------------------------------------------|--------------------------|--------------------------|------------------------------------------------------------------------|-------------|
| 1. Herz-Kreislaufkrankung?                                       | <input type="checkbox"/> | <input type="checkbox"/> | <input type="checkbox"/> <input type="checkbox"/> . Lj                 | _____       |
| 2. Andere Organerkrankung?<br>(z.B. Leber, Niere, Magen,...)     | <input type="checkbox"/> | <input type="checkbox"/> |                                                                        | _____       |
| 3. Neurologische Erkrankungen?<br>(z.B. Schlaganfall, Epilepsie) | <input type="checkbox"/> | <input type="checkbox"/> | <input type="checkbox"/> <input type="checkbox"/> . Lj                 | _____       |

| Allgemeinanamnese                                                                 | Ja                       | Nein                     | Falls ja, ab welchem Lebensjahr bzw. wann wurde Erstdiagnose gestellt? | Anmerkungen             |
|-----------------------------------------------------------------------------------|--------------------------|--------------------------|------------------------------------------------------------------------|-------------------------|
| 4. Stoffwechselerkrankung?<br>(z.B. Blutzucker, Schilddrüse, Fettstoffwechsel,..) | <input type="checkbox"/> | <input type="checkbox"/> | □□. Lj                                                                 | _____<br>_____<br>_____ |
| 5. Seelische Erkrankungen?                                                        | <input type="checkbox"/> | <input type="checkbox"/> | □□. Lj                                                                 | _____<br>_____          |
| 6. Schwangerschaft?                                                               | <input type="checkbox"/> | <input type="checkbox"/> |                                                                        | _____<br>_____          |
| 7. Medikamenteneinnahme?                                                          | <input type="checkbox"/> | <input type="checkbox"/> | □□. Lj                                                                 | _____<br>_____          |
| 8. Medikamente, die die Reaktionszeit beeinflussen?                               | <input type="checkbox"/> | <input type="checkbox"/> | □□. Lj                                                                 | _____<br>_____          |
| 9. Andere Erkankungen?                                                            | <input type="checkbox"/> | <input type="checkbox"/> | □□. Lj                                                                 | _____<br>_____          |
| 10. Haben Sie Allergien?                                                          | <input type="checkbox"/> | <input type="checkbox"/> |                                                                        | _____<br>_____          |

Sonstige Anmerkungen:

---



---
